# Supplementary material
Source: PubMed Central journal article supplement (PMC3040440)

# Supplementary Figure 1

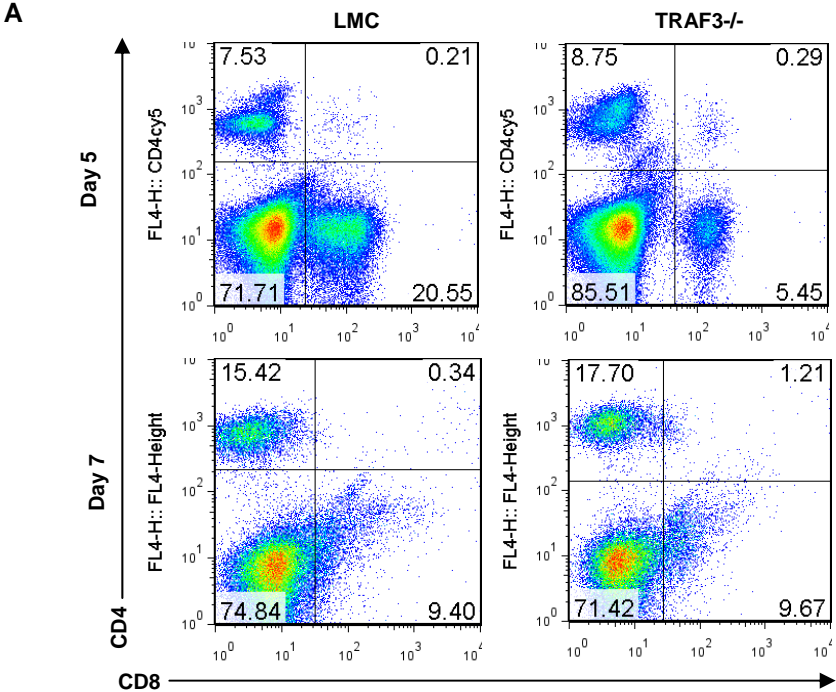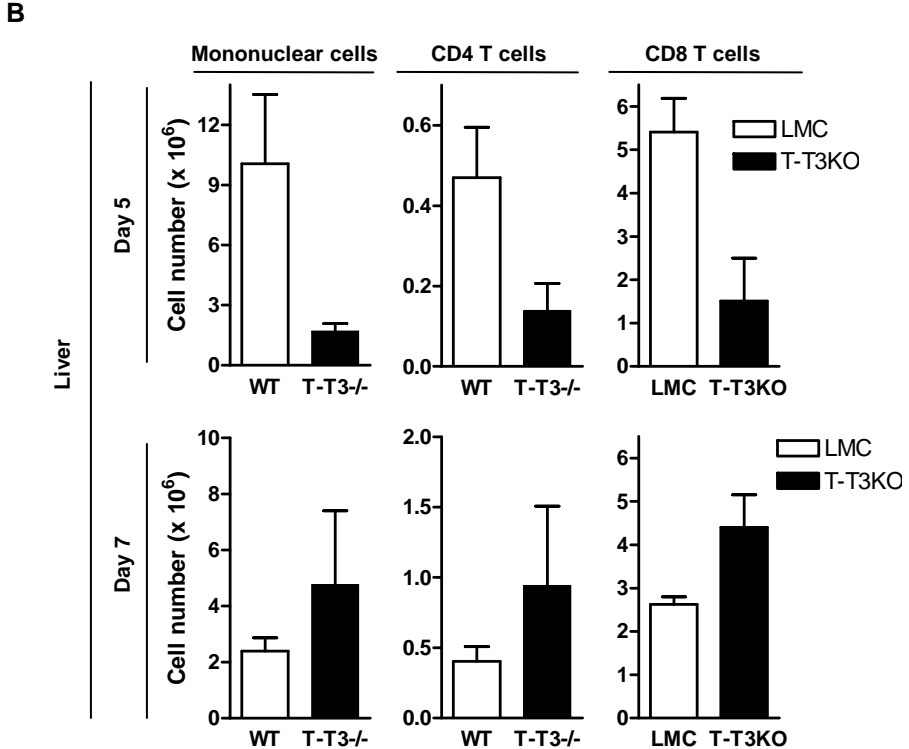

## Supplementary Figure 2

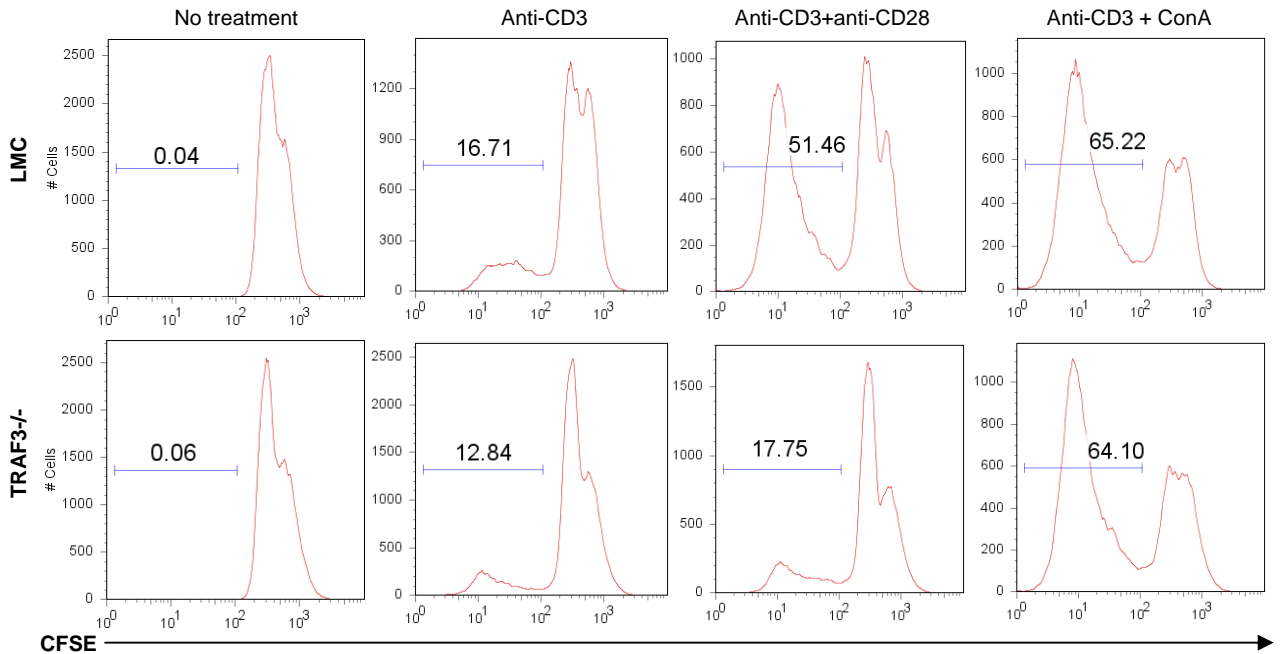

# Supplementary Figure 3

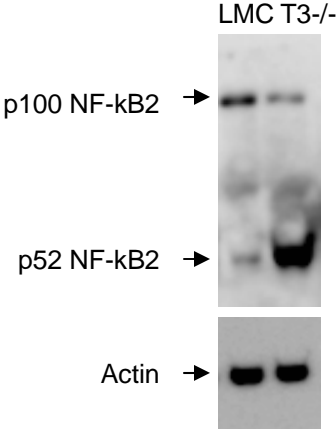

# Supplementary Figure 4

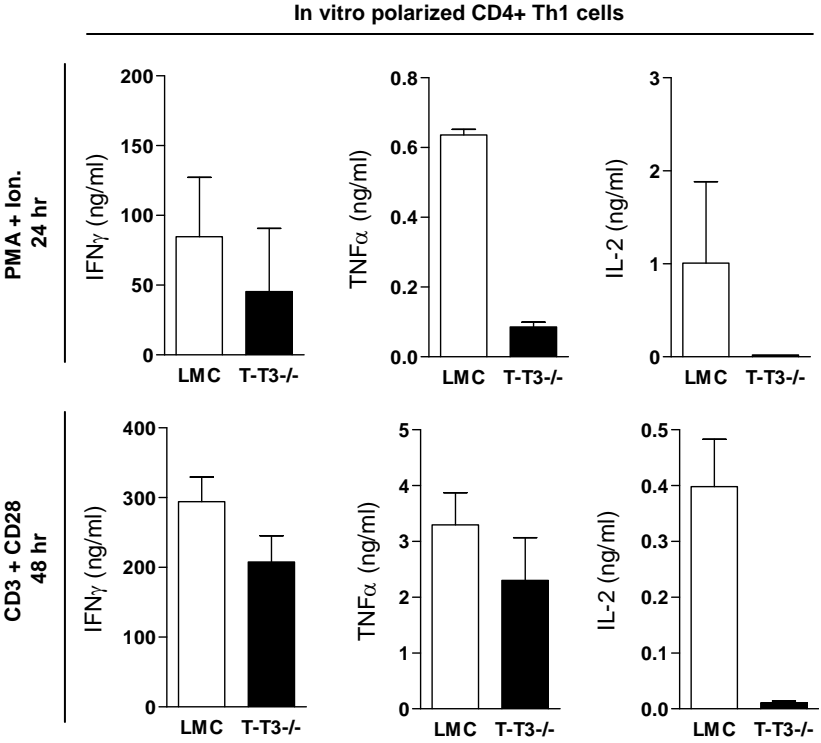

# Supplementary Figure 5

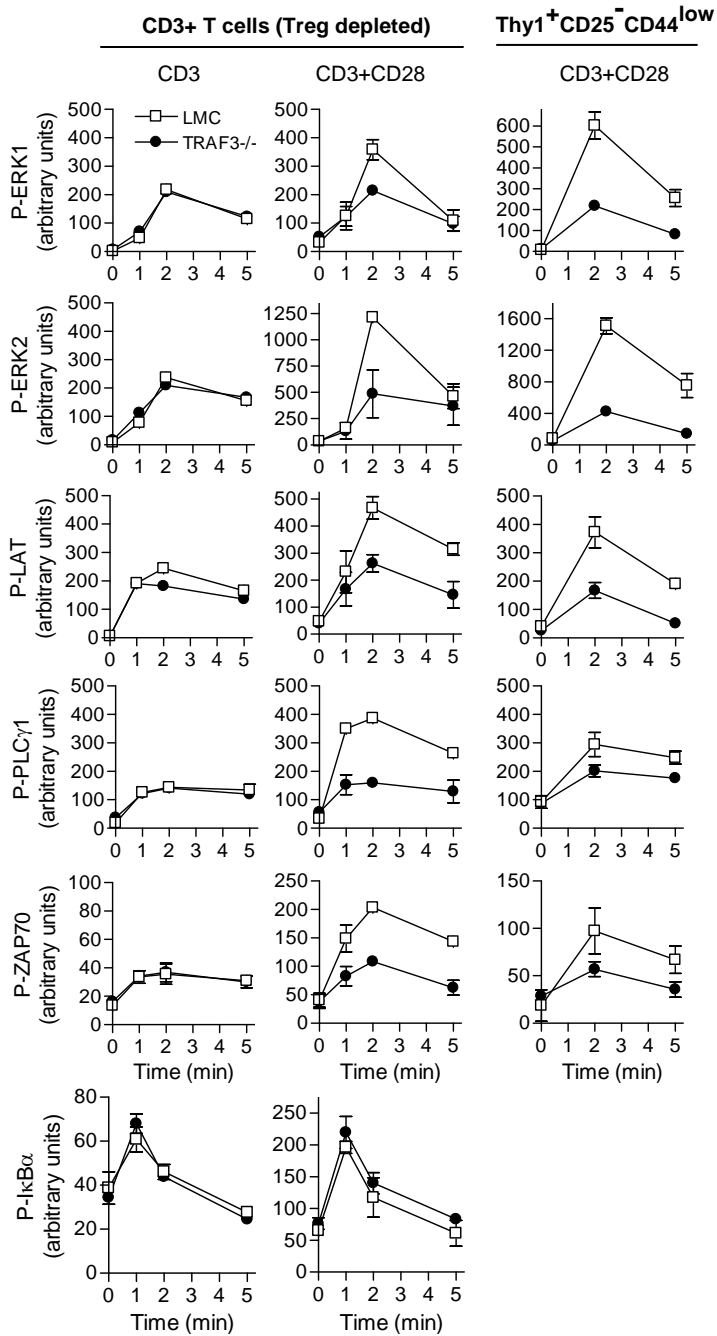

Supplement: NIHMS272312-supplement-revised_supplementary_figures.pdf [file NIHMS272312-supplement-revised_supplementary_figures.pdf]
